# Supplementary material for: Lipogels: surface-adherent composite hydrogels assembled from poly(vinyl alcohol) and liposomes
Source: Royal Society of Chemistry journal article supplement (doi:10.1039/c3nr01662e), 2013-01-01
Supplement: c3nr01662e.pdf [file c3nr01662e.pdf]

## Electronic Supplementary Information:

### Lipogels: Surface-Adherent Composite Hydrogels Assembled from Poly(Vinyl Alcohol) and Liposomes

Bettina E. B. Jensen,<sup>a</sup> Leticia Hosta-Rigau,<sup>b</sup> Philipp R. Spycher,<sup>c</sup> Erik Reimhult,<sup>d</sup>  
Brigitte Städler,<sup>b</sup> and Alexander N. Zelikin<sup>\*,a,b</sup>

<sup>a</sup> Department of Chemistry, Aarhus University, Aarhus, Denmark. Tel: +45 8715 5906; E-mail: [zelikin@chem.au.dk](mailto:zelikin@chem.au.dk)

<sup>b</sup> iNANO Interdisciplinary Nanoscience Centre, Aarhus University, Aarhus, Denmark. Tel: +45 8715 6668, Email : [bstadler@inano.au.dk](mailto:bstadler@inano.au.dk)

<sup>c</sup> Department of Health Sciences and Technology, ETH Zurich, Zurich, Switzerland

<sup>d</sup> Institute for Biologically inspired materials, University of Natural Resources and Life Sciences Vienna, Vienna, Austria

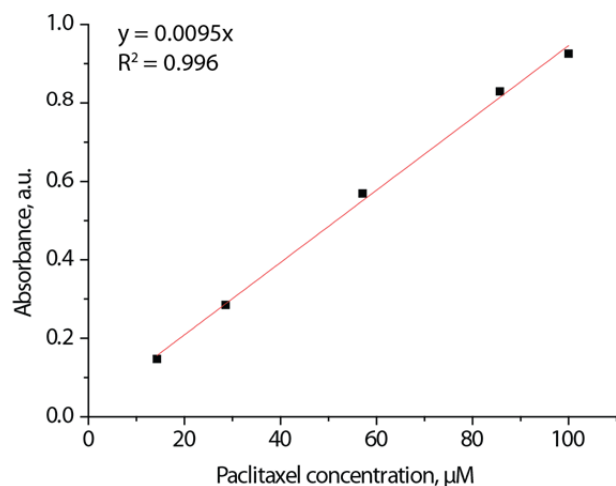

**Figure S1.** Calibration curve for the absorbance of paclitaxel versus the concentration.

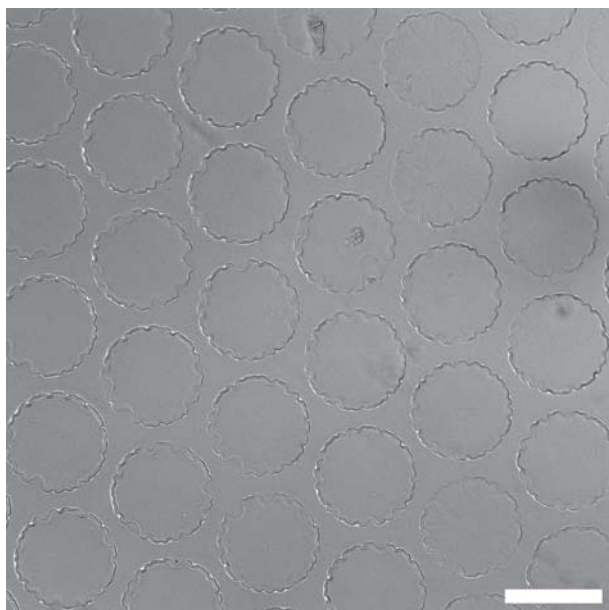

**Figure S2.** DIC image showing ruffled edges along the structures of PVA hydrogels blended with PLL (1 g/L). The samples were salted out for 1 h in  $\text{Na}_2\text{SO}_4$  and incubated in PBS for 1 h. Scalebar: 100  $\mu\text{m}$ .

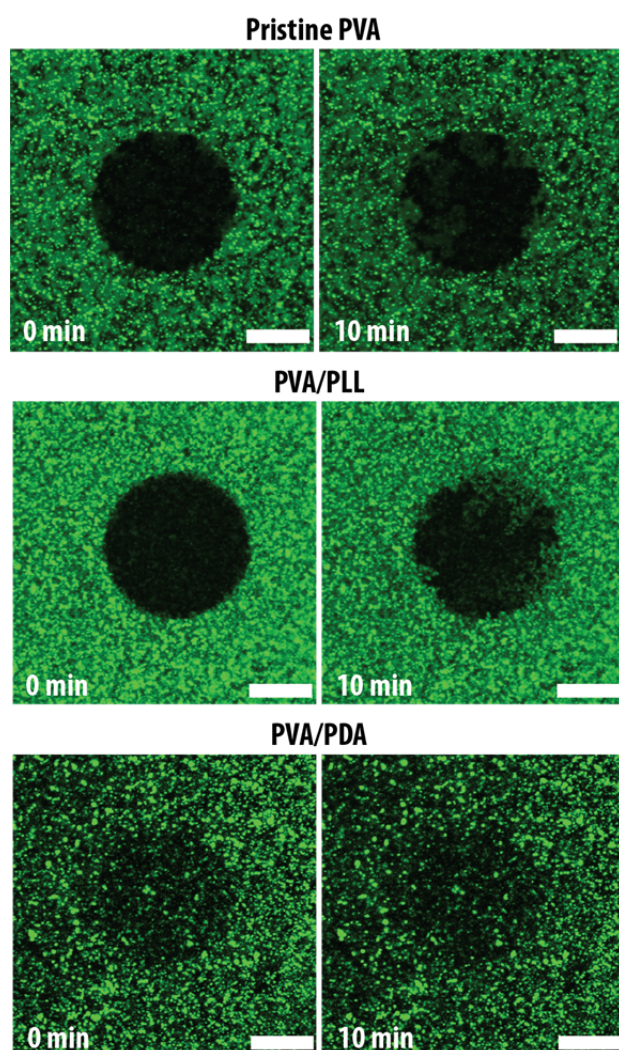

**Figure S3.** FRAP images of pristine (no cell pro-adhesive), PLL blended, and PDA coated 8× lipogels.

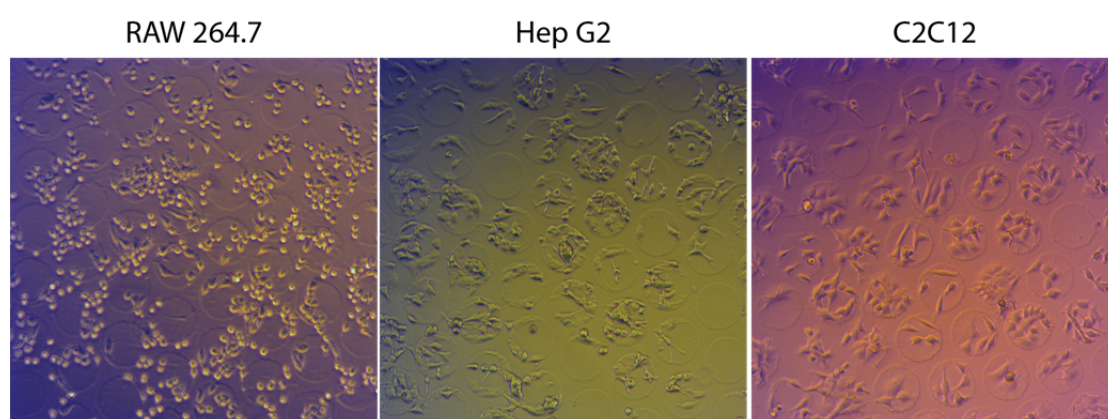

**Figure S4.** RAW 264.7, Hep G2, and C2C12 cell lines seeded on lipogels. The images were captures after allowing the cells to attach for 24 h using a Zeiss Primo Vert microscope and 10x objective.
